# Supplementary material for: A Delphi Study to Determine International and National Equestrian Expert Opinions on Domains and Sub-Domains Essential to Managing Sporthorse Health and Welfare in the Olympic Disciplines
Source: MDPI journal article supplement (doi:10.3390/ani13213404), 2023-11-02
Supplement: s1 [file s1]

## Supplementary File S1: Monitoring Sporthorse Health and Welfare

Key to analysis for essential rating to sporthorse health and welfare:

|                                                 |                                |                                                 |
|-------------------------------------------------|--------------------------------|-------------------------------------------------|
| <b>Above 70% agreement<br/>Consensus agreed</b> | <b>Above average agreement</b> | <b>Below average agreement<br/>No consensus</b> |
|-------------------------------------------------|--------------------------------|-------------------------------------------------|

Average agreement:

|                     |                |                      |                    |                |                   |
|---------------------|----------------|----------------------|--------------------|----------------|-------------------|
| Above 90%           | 80-89%         | 70-79%               | 60-69%             | 50-59%         | Less than 50%     |
| Excellent agreement | Good agreement | Acceptable agreement | Moderate agreement | Poor agreement | Lack of agreement |

### General Management: Factors which should be regularly assessed

Table S1: Overview of agreement: General Management

| <b>Average agreement: 48%</b>                                                   | <b>Agreement: Essential to sporthorse health and welfare</b> | <b>Agreement: Can currently be assessed accurately</b> |
|---------------------------------------------------------------------------------|--------------------------------------------------------------|--------------------------------------------------------|
| Environment and climate management e.g., air quality, temperature, and humidity | 54%                                                          | 11%                                                    |
| Behavioural assessment of the horse-human interaction when ridden               | 66%                                                          | 14%                                                    |
| Workload details e.g., duration, frequency, intensity, type of exercise         | 76%                                                          | 69%                                                    |
| Travelling schedule e.g., frequency, duration, hydration, feeding etc           | 78%                                                          | 17%                                                    |
| Surface management                                                              | 70%                                                          | 43%                                                    |
| Horse fitness for exercise                                                      | 90%                                                          | 58%                                                    |
| Horse recovery after exercise                                                   | 72%                                                          | 44%                                                    |
| Musculoskeletal health e.g., gait and lameness assessment                       | 78%                                                          | 22%                                                    |
| Behavioural assessment: horse                                                   | 79%                                                          | 19%                                                    |
| Behavioural assessment: handler / rider                                         | 56%                                                          | 17%                                                    |
| Behavioural assessment: horse and rider combination                             | 60%                                                          | 26%                                                    |
| Behavioural assessment of the horse-human interaction: In-hand                  | 56%                                                          | 3%                                                     |
| Appropriate use of tack and equipment                                           | 84%                                                          | 56%                                                    |
| Biomarkers of disease                                                           | 34%                                                          | 9%                                                     |
| Blood profiles for disease and injury                                           | 26%                                                          | 9%                                                     |
| Injury records e.g., type of injury, days out of training, recurrence etc       | 78%                                                          | 23%                                                    |
| Choice and appropriate fit of tack and equipment                                | 72%                                                          | 51%                                                    |

|                                                                          |     |     |
|--------------------------------------------------------------------------|-----|-----|
| Husbandry monitoring e.g., stable size, turnout, sleep etc               | 60% | 3%  |
| Nutrition e.g., forage, concentrates, water, use of supplements etc      | 70% | 3%  |
| Blood profiling: red blood cell counts                                   | 2%  | 11% |
| Blood profiling: white blood cell counts                                 | 6%  | 9%  |
| Blood profiling: total blood cell counts                                 | 2%  | 12% |
| Health related biomarkers                                                | 42% | 6%  |
| Biomarkers of inflammation                                               | 46% | 9%  |
| Health assessment e.g., temperature, pulse, respiration etc              | 68% | 17% |
| Adherence to rules and regulations e.g., FEI and National Governing Body | 70% | 11% |
| Blood profiles for disease and injury                                    | 32% | 17% |
| Farriery / hoof care e.g., frequency, changes to routine etc.            | 82% | 6%  |
| Medication records                                                       | 68% | 15% |
| Record of any supplements used                                           | 32% | 17% |
| Body weight (using a weigh bridge)                                       | 14% | 14% |
| Body Condition Score                                                     | 44% | 11% |
| Pain scoring of unriden horse                                            | 46% | 14% |
| Pain scoring of ridden horse                                             | 58% | 6%  |
| Welfare assessment e.g., using an established welfare tool               | 66% | 11% |

Key: Positive values 1 to 100% represent agreement for if the area is considered essential; 0 represents no clear agreement if area is essential or not; negative values -1 to -100% indicate disagreement for is the area is considered not essential.

### Climate and Environment Monitoring

Table S2: Overview of agreement: Climate and Environment Monitoring

| Average agreement: 48%                           | Agreement: Essential to sporthorse health and welfare | Agreement: Can currently be assessed accurately |
|--------------------------------------------------|-------------------------------------------------------|-------------------------------------------------|
| Quality of surfaces used for ridden exercise     | 80%                                                   | 55%                                             |
| Internal air quality: housing / indoor arenas    | 68%                                                   | 57%                                             |
| Humidity: housing / indoor arenas                | 65%                                                   | 70%                                             |
| Internal humidity: housing / indoor arenas       | 59%                                                   | 72%                                             |
| Moisture content of surfaces                     | 57%                                                   | 45%                                             |
| Quality of surfaces used for turnout             | 48%                                                   | 43%                                             |
| Quality of surfaces used for non-ridden exercise | 42%                                                   | 49%                                             |
| External temperature                             | 42%                                                   | 74%                                             |
| Environmental humidity                           | 34%                                                   | 68%                                             |
| Direct / indirect sunlight                       | 22%                                                   | 52%                                             |
| External air quality                             | 16%                                                   | 50%                                             |
| Wind direction and speed                         | 10%                                                   | 68%                                             |

Key: Positive values 1 to 100% represent agreement for if the area is considered essential; 0 represents no clear agreement if area is essential or not; negative values -1 to -100% indicate disagreement for is the area is considered not essential.

### Stable Management Monitoring

Table S3: Overview of agreement: Stable Management Monitoring

| Average agreement: 56%                                                        | Agreement: Essential to sporthorse health and welfare: | Agreement: Can currently be assessed accurately: |
|-------------------------------------------------------------------------------|--------------------------------------------------------|--------------------------------------------------|
| Quantity and quality of bedding available for use                             | 100%                                                   | 61%                                              |
| Monitoring of stable size to horse size                                       | 100%                                                   | 71%                                              |
| Frequency, quantity and type of feed and water provided                       | 100%                                                   | 74%                                              |
| Observation and recording of handler / rider / horse interaction              | 100%                                                   | 48%                                              |
| Measurement and recording of exercise type, frequency and duration outside... | 82%                                                    | 58%                                              |
| Regular veterinary examinations: general health                               | 80%                                                    | 73%                                              |
| Observation and recording of horse behaviour                                  | 78%                                                    | 42%                                              |
| Pain assessment                                                               | 70%                                                    | 45%                                              |
| Regular veterinary examinations: lameness                                     | 68%                                                    | 68%                                              |
| Assessment of ventilation                                                     | 63%                                                    | 65%                                              |
| Monitoring of tack and equipment used for handling                            | 55%                                                    | 52%                                              |
| Measurement and recording of time spent stabled                               | 49%                                                    | 58%                                              |
| Analysis of temperature in stables                                            | 48%                                                    | 71%                                              |
| Welfare assessment e.g. using an established welfare tool                     | 43%                                                    | 27%                                              |
| Measurement and recording of time spent outside the stable                    | 43%                                                    | 58%                                              |
| Analysis of air quality in stables                                            | 40%                                                    | 61%                                              |
| Observation and recording of type and frequency of social interaction between | 34%                                                    | 50%                                              |
| Analysis of humidity in stables                                               | 32%                                                    | 71%                                              |
| Use of behavioural assessment tools such as Equifacs                          | 26%                                                    | 27%                                              |
| Analysis of direct/ indirect sunlight                                         | 12%                                                    | 42%                                              |
| Testing measures of stress                                                    | 12%                                                    | 19%                                              |
| Use of wearable technology to assess horse behaviour                          | 0%                                                     | 23%                                              |
| Video analysis within stable environment                                      | -25%                                                   | 33%                                              |

Key: Positive values 1 to 100% represent agreement for if the area is considered essential; 0 represent no clear agreement if area is essential or not; negative values -1 to -100% indicate disagreement for is the area is considered not essential.

## Health and Veterinary Assessment and Monitoring

Table S4: Overview of agreement: Health and Veterinary Assessment and Monitoring

| <b>Average agreement: 54%</b>                                                  | <b>Agreement: Essential to sporthorse health and welfare:</b> | <b>Agreement: Can currently be assessed accurately:</b> |
|--------------------------------------------------------------------------------|---------------------------------------------------------------|---------------------------------------------------------|
| Gait analysis: visual lameness assessment                                      | 100%                                                          | 52%                                                     |
| Lameness records                                                               | 94%                                                           | 58%                                                     |
| Assessment of presence of pain                                                 | 86%                                                           | 35%                                                     |
| Clinical health check (e.g. temperature, heart rate, respiratory rate, head... | 80%                                                           | 65%                                                     |
| Disease and injury records                                                     | 76%                                                           | 55%                                                     |
| Vaccination records                                                            | 74%                                                           | 71%                                                     |
| Records of medication                                                          | 72%                                                           | 47%                                                     |
| Faecal analysis e.g. for parasites                                             | 60%                                                           | 71%                                                     |
| Assessment of muscle symmetry                                                  | 56%                                                           | 39%                                                     |
| Records of veterinary interventions and treatments                             | 56%                                                           | 52%                                                     |
| Feed analysis                                                                  | 56%                                                           | 48%                                                     |
| Behavioural assessment of pain (e.g. ridden horse ethogram, grimace scale)     | 54%                                                           | 42%                                                     |
| Colic records                                                                  | 54%                                                           | 63%                                                     |
| Monitoring of hydration status                                                 | 54%                                                           | 39%                                                     |
| Body weight monitoring                                                         | 48%                                                           | 55%                                                     |
| Body condition score monitoring                                                | 40%                                                           | 58%                                                     |
| Gait analysis using specifically designed technology                           | 40%                                                           | 48%                                                     |
| Heart rate and/or ECG analysis                                                 | 30%                                                           | 65%                                                     |
| Respiratory health monitoring e.g., scoping                                    | 14%                                                           | 58%                                                     |
| Routine blood analysis (e.g., biochemistry and haematology)                    | 4%                                                            | 74%                                                     |

Key: Positive values 1 to 100% represent agreement for if the area is considered essential; 0 represent no clear agreement if area is essential or not; negative values -1 to -100% indicate disagreement for is the area is considered not essential.

## Gait / Lameness Assessment Monitoring

Table S5: Overview of agreement: Gait / Lameness Assessment Monitoring

| <b>Average agreement: 30%</b>                                           | <b>Agreement: Essential to sporthorse health and welfare:</b> | <b>Agreement: Can currently be assessed accurately:</b> |
|-------------------------------------------------------------------------|---------------------------------------------------------------|---------------------------------------------------------|
| Visual assessment of lameness                                           | 86%                                                           | 52%                                                     |
| Veterinary assessment of gait / lameness                                | 80%                                                           | 58%                                                     |
| Behavioural / pain assessment                                           | 74%                                                           | 39%                                                     |
| Injury history                                                          | 60%                                                           | 58%                                                     |
| Asymmetry analysis                                                      | 56%                                                           | 45%                                                     |
| Stride duration, length and frequency analysis                          | 42%                                                           | 42%                                                     |
| Joint movement analysis                                                 | 42%                                                           | 45%                                                     |
| Computer based motion analysis                                          | 16%                                                           | 52%                                                     |
| Commercial gait analysis systems designed to be used by owners / riders | 4%                                                            | 29%                                                     |
| Use of video footage to assess gait                                     | 4%                                                            | 32%                                                     |
| Saddle pressure mats                                                    | -4%                                                           | 29%                                                     |
| Force or pressure plate analysis                                        | -28%                                                          | 32%                                                     |
| Thermography                                                            | -42%                                                          | 26%                                                     |

Key: Positive values 1 to 100% represent agreement for if the area is considered essential; 0 represent no clear agreement if area is essential or not; negative values -1 to -100% indicate disagreement for if the area is considered not essential.

## Behaviour Assessment and Monitoring

Table S6: Overview of agreement: Behaviour Assessment and Monitoring

| <b>Average agreement: 28%</b>                                               | <b>Agreement: Essential to sporthorse health and welfare:</b> | <b>Agreement: Can currently be assessed accurately:</b> |
|-----------------------------------------------------------------------------|---------------------------------------------------------------|---------------------------------------------------------|
| Observation of behaviour                                                    | 74%                                                           | 35%                                                     |
| Pain assessment: ridden                                                     | 62%                                                           | 29%                                                     |
| Monitoring of the fit and frequency of use of tack and equipment            | 60%                                                           | 35%                                                     |
| Pain assessment: non-ridden                                                 | 54%                                                           | 30%                                                     |
| Behavioural assessment tools                                                | 36%                                                           | 26%                                                     |
| Records of daily routine including social interaction, feeding and exercise | 34%                                                           | 52%                                                     |
| Animal Welfare Indicators (AWIN) protocol                                   | 32%                                                           | 26%                                                     |
| Ridden horse ethogram                                                       | 28%                                                           | 37%                                                     |
| Ethograms                                                                   | 18%                                                           | 39%                                                     |
| Heart rate analysis (at rest)                                               | 4%                                                            | 68%                                                     |
| Cortisol assessment                                                         | 2%                                                            | 53%                                                     |
| Biomarkers of stress                                                        | -2%                                                           | 29%                                                     |
| Video analysis                                                              | -4%                                                           | 45%                                                     |
| Heart rate variability analysis (at rest)                                   | -4%                                                           | 65%                                                     |

Key: Positive values 1 to 100% represent agreement for if the area is considered essential; 0 represent no clear agreement if area is essential or not; negative values -1 to -100% indicate disagreement for if the area is considered not essential.

## Fitness / Recovery Assessment and Monitoring

Table S7: Overview of agreement: Fitness / Recovery Assessment and Monitoring

| <b>Average agreement: 41%</b>                                                   | <b>Agreement: Essential to sporthorse health and welfare:</b> | <b>Agreement: Can currently be assessed accurately:</b> |
|---------------------------------------------------------------------------------|---------------------------------------------------------------|---------------------------------------------------------|
| Horse fitness for exercise                                                      | 90%                                                           | 65%                                                     |
| Gait analysis: visual lameness assessment                                       | 74%                                                           | 52%                                                     |
| Horse recovery after exercise                                                   | 72%                                                           | 68%                                                     |
| Clinical health check (e.g. temperature, pulse, respiratory rate, head to tail) | 66%                                                           | 68%                                                     |
| Behavioural assessment of pain (e.g. ridden horse ethogram, grimace scale)      | 60%                                                           | 39%                                                     |
| Workload assessment                                                             | 58%                                                           | 30%                                                     |
| Temperature: rectal, skin or core temperature                                   | 56%                                                           | 71%                                                     |
| Behavioural assessment of ridden work                                           | 54%                                                           | 43%                                                     |
| Hydration status                                                                | 54%                                                           | 55%                                                     |
| Heart rate monitoring during recovery                                           | 52%                                                           | 74%                                                     |

|                                                                               |      |     |
|-------------------------------------------------------------------------------|------|-----|
| Blood profiling: lactate levels                                               | 52%  | 61% |
| Visual assessment of muscle symmetry                                          | 48%  | 48% |
| Heart rate monitoring during exercise                                         | 40%  | 61% |
| Gait analysis using specifically designed technology                          | 34%  | 45% |
| Standardised exercise test                                                    | 26%  | 37% |
| Blood profiling: electrolyte analysis                                         | 24%  | 61% |
| Assessment of presence of muscular pain (e.g. handheld algometer)             | 22%  | 35% |
| Health related biomarkers                                                     | 16%  | 48% |
| Blood profiling: haematology (e.g. white and red blood cell counts)           | 14%  | 65% |
| Blood profiling: biochemistry (e.g. biomarkers of health, inflammation and... | 12%  | 65% |
| Heart rate variability at rest                                                | 6%   | 68% |
| Salivary cortisol assessment                                                  | -26% | 39% |

Key: Positive values 1 to 100% represent agreement for if the area is considered essential; 0 represent no clear agreement if area is essential or not; negative values -1 to -100% indicate disagreement for if the area is considered not essential.

## Training Assessment and Monitoring

Table S8: Overview of agreement: Training Assessment and Monitoring

| <b>Average agreement: 50%</b>                                                  | <b>Agreement: Essential to sporthorse health and welfare:</b> | <b>Agreement: Can currently be assessed accurately:</b> |
|--------------------------------------------------------------------------------|---------------------------------------------------------------|---------------------------------------------------------|
| Long term monitoring of training                                               | 94%                                                           | 59%                                                     |
| Record of feed, forage, and water                                              | 94%                                                           | 69%                                                     |
| Time spent stabled                                                             | 82%                                                           | 59%                                                     |
| Workload monitoring: duration, activity: type and intensity and frequency      | 80%                                                           | 57%                                                     |
| Gait analysis: visual lameness assessment by owner, groom or rider             | 80%                                                           | 40%                                                     |
| Warm up monitoring: duration, activity: type and intensity and frequency       | 80%                                                           | 67%                                                     |
| Food and water intake and frequency of feeding                                 | 74%                                                           | 59%                                                     |
| Opportunities and time spent in free exercise (not related to training)        | 74%                                                           | 57%                                                     |
| Veterinary assessment of gait / lameness                                       | 72%                                                           | 62%                                                     |
| Injury and disease records                                                     | 68%                                                           | 66%                                                     |
| Clinical health check (e.g. temperature, heart rate, respiratory rate, head... | 68%                                                           | 63%                                                     |
| Fitness testing of the rider                                                   | 68%                                                           | 59%                                                     |
| Medication records                                                             | 62%                                                           | 69%                                                     |

|                                                                            |      |     |
|----------------------------------------------------------------------------|------|-----|
| Assessment of presence of muscular pain (e.g. handheld manometer)          | 60%  | 27% |
| Behavioural assessment of ridden work                                      | 60%  | 33% |
| Assessment of muscle symmetry                                              | 48%  | 30% |
| Behavioural assessment of pain (e.g. ridden horse ethogram, grimace scale) | 48%  | 40% |
| Temperature: body, surface and rectal                                      | 48%  | 66% |
| Records of days lost from training                                         | 48%  | 69% |
| Records of supplements used                                                | 48%  | 69% |
| Saddle pressure (magnitude and distribution)                               | 46%  | 43% |
| Opportunities for social interaction                                       | 46%  | 45% |
| Rein tension evaluation (magnitude and symmetry)                           | 42%  | 50% |
| Sleep quantity and quality                                                 | 42%  | 28% |
| Standardised exercise tests to assess fitness level                        | 34%  | 50% |
| Hydration status                                                           | 34%  | 59% |
| Body condition score monitoring                                            | 28%  | 57% |
| Bodyweight monitoring (using weight bridge)                                | 24%  | 60% |
| Gait analysis using specifically designed technology                       | 20%  | 53% |
| Heart rate monitoring                                                      | 18%  | 62% |
| Bloods: Lactate                                                            | 18%  | 67% |
| Bloods: biochemistry (e.g., biomarkers of inflammation and muscle damage)  | 14%  | 70% |
| Bloods: haematology (e.g., white and red blood cell counts)                | 14%  | 70% |
| Bloods: electrolyte analysis                                               | 14%  | 70% |
| Bloods: cortisol analysis                                                  | -14% | 57% |

Key: Positive values 1 to 100% represent agreement for if the area is considered essential; 0 represent no clear agreement if area is essential or not; negative values -1 to -100% indicate disagreement for if the area is considered not essential.

## Monitoring in Competition

Table S9: Overview of agreement: Monitoring in Competition

| <b>Average agreement: 44%</b>                                                  | <b>Agreement: Essential to sporthorse health and welfare:</b> | <b>Agreement: Can currently be assessed accurately:</b> |
|--------------------------------------------------------------------------------|---------------------------------------------------------------|---------------------------------------------------------|
| Veterinary assessment of gait / lameness                                       | 94%                                                           | 67%                                                     |
| Medication records                                                             | 88%                                                           | 76%                                                     |
| Gait analysis: visual lameness assessment                                      | 86%                                                           | 63%                                                     |
| Warm up monitoring: duration, activity: type and intensity and frequency       | 80%                                                           | 57%                                                     |
| Clinical health check (e.g. temperature, heart rate, respiratory rate, head... | 80%                                                           | 70%                                                     |



|                                                                                      |      |     |
|--------------------------------------------------------------------------------------|------|-----|
| Workload monitoring: duration, activity: type and intensity and frequency            | 80%  | 60% |
| Records of competition undertaken: no of classes, duration, performance etc          | 74%  | 77% |
| Food and water intake and frequency of feeding                                       | 74%  | 50% |
| Records of travelling: distance, time, watering, nutrition                           | 72%  | 69% |
| Records of supplements used                                                          | 68%  | 46% |
| Injury and disease records                                                           | 66%  | 73% |
| Sleep quantity and quality                                                           | 54%  | 67% |
| Opportunities for social interaction                                                 | 54%  | 40% |
| Time spent stabled                                                                   | 54%  | 73% |
| Behavioural assessment of pain – stabled (e.g. ridden horse ethogram, grimace scale) | 52%  | 47% |
| Opportunities and time spent in free exercise                                        | 52%  | 52% |
| Monitoring of recovery after exercise                                                | 46%  | 70% |
| Access to long term training records                                                 | 46%  | 60% |
| Monitoring and tracking of performance in horse and rider combinations               | 46%  | 55% |
| Stable size measurement                                                              | 46%  | 73% |
| Daily veterinary assessment                                                          | 46%  | 67% |
| Monitoring of adherence to competition / governing body rules                        | 40%  | 50% |
| Records of days lost from training                                                   | 40%  | 72% |
| Access to long term competition records                                              | 34%  | 69% |
| Heart rate monitoring                                                                | 32%  | 73% |
| Measures of stress                                                                   | 28%  | 27% |
| Gait analysis using specifically designed technology                                 | 20%  | 53% |
| Saddle pressure magnitude and distribution                                           | 14%  | 43% |
| Rein tension evaluation                                                              | 14%  | 45% |
| Video analysis and records of human horse interactions                               | 6%   | 70% |
| Bloods profiling: lactate                                                            | -6%  | 77% |
| Blood profiling to assess health                                                     | -6%  | 57% |
| Health related biomarkers                                                            | -32% | 50% |
| Blood or saliva cortisol measurement                                                 | -38% | 50% |

Key: Positive values 1 to 100% represent agreement for if the area is considered essential; 0 represent no clear agreement if area is essential or not; negative values -1 to -100% indicate disagreement that the area is considered not essential.

## Welfare Assessment and Monitoring

Table S10: Overview of agreement: Welfare Assessment and Monitoring

| <b>Average agreement: 49%</b>                                    | <b>Agreement: Essential to sporthorse health and welfare:</b> | <b>Agreement: Can currently be assessed accurately:</b> |
|------------------------------------------------------------------|---------------------------------------------------------------|---------------------------------------------------------|
| Pain assessment                                                  | 88%                                                           | 41%                                                     |
| Regular records of horse health                                  | 84%                                                           | 66%                                                     |
| Regular records of horse management                              | 80%                                                           | 64%                                                     |
| Tack and equipment use and fit assessment                        | 72%                                                           | 41%                                                     |
| Type, presence, severity and frequency of stereotypic behaviours | 52%                                                           | 48%                                                     |
| Biomarkers of stress                                             | 44%                                                           | 29%                                                     |
| Measures of stress e.g. cortisol                                 | 44%                                                           | 52%                                                     |
| Use of validated welfare tools                                   | 40%                                                           | 24%                                                     |
| Animal Welfare Indicators (AWIN) protocol                        | 2%                                                            | 21%                                                     |
| Video analysis of horse human interactions                       | -18%                                                          | 21%                                                     |

Key: Positive values 1 to 100% represent agreement for if the area is considered essential; 0 represent no clear agreement if area is essential or not; negative values -1 to -100% indicate disagreement for if the area is considered not essential.

## Frequency of monitoring

Table S11: Expert opinion for how often measures related to sport horse health and welfare should be monitored;

shaded squares indicate the most frequent response.

|                                                                                 | More than once per day | Daily | Weekly | 3-5 times per week | Monthly | Ad hoc |
|---------------------------------------------------------------------------------|------------------------|-------|--------|--------------------|---------|--------|
| Environment and climate management e.g., air quality, temperature, and humidity | 19%                    | 31%   | 22%    | 8%                 | 8%      | 11%    |
| Behavioural assessment of the horse-human interaction when ridden               | 3%                     | 39%   | 19%    | 6%                 | 19%     | 14%    |
| Workload details e.g., duration, frequency, intensity, type of exercise         | 3%                     | 36%   | 39%    | 3%                 | 14%     | 6%     |
| Travelling schedule e.g., frequency, duration, hydration, feeding etc.          | 11%                    | 14%   | 17%    | 8%                 | 31%     | 19%    |
| Surface management                                                              | 6%                     | 56%   | 19%    | 8%                 | 6%      | 6%     |
| Horse fitness for exercise                                                      | 0%                     | 56%   | 25%    | 8%                 | 8%      | 3%     |
| Horse recovery after exercise                                                   | 3%                     | 75%   | 8%     | 0%                 | 6%      | 8%     |
| Musculoskeletal health e.g., gait and lameness assessment                       | 0%                     | 56%   | 17%    | 3%                 | 14%     | 11%    |
| Behavioural assessment: horse                                                   | 6%                     | 37%   | 17%    | 11%                | 17%     | 11%    |
| Behavioural assessment: handler / rider                                         | 3%                     | 31%   | 17%    | 11%                | 17%     | 20%    |
| Behavioural assessment: horse and rider combination                             | 3%                     | 37%   | 20%    | 6%                 | 20%     | 14%    |

|                                                                              |     |     |     |    |     |     |
|------------------------------------------------------------------------------|-----|-----|-----|----|-----|-----|
| Behavioural assessment of the horse-human interaction:<br>In-hand            | 3%  | 39% | 17% | 8% | 17% | 17% |
| Appropriate use of tack and equipment                                        | 0%  | 53% | 14% | 3% | 19% | 11% |
| Biomarkers of disease                                                        | 0%  | 3%  | 3%  | 3% | 23% | 69% |
| Blood profiles for disease and injury                                        | 0%  | 0%  | 6%  | 3% | 29% | 63% |
| Injury records e.g., type of injury, days out of training,<br>recurrence etc | 0%  | 18% | 6%  | 3% | 50% | 24% |
| Choice and appropriate fit of tack and equipment                             | 0%  | 44% | 11% | 3% | 25% | 17% |
| Husbandry monitoring e.g., stable size, turnout, sleep etc                   | 0%  | 17% | 36% | 8% | 17% | 22% |
| Nutrition e.g., forage, concentrates, water, use of<br>supplements etc       | 3%  | 36% | 19% | 3% | 33% | 6%  |
| Blood profiling: red blood cell counts                                       | 0%  | 3%  | 3%  | 3% | 31% | 61% |
| Blood profiling: white blood cell counts                                     | 0%  | 3%  | 3%  | 3% | 25% | 67% |
| Blood profiling: total blood cell counts                                     | 0%  | 3%  | 3%  | 3% | 26% | 66% |
| Health related biomarkers                                                    | 0%  | 6%  | 3%  | 3% | 29% | 60% |
| Biomarkers of inflammation                                                   | 0%  | 3%  | 3%  | 0% | 26% | 69% |
| Health assessment e.g., temperature, pulse, respiration etc                  | 16% | 41% | 14% | 8% | 3%  | 19% |
| Adherence to rules and regulations e.g., FEI and National<br>Governing Body  | 0%  | 19% | 14% | 3% | 24% | 41% |
| Farriery / hoof care e.g., frequency, changes etc                            | 0%  | 16% | 16% | 5% | 54% | 8%  |

|                                                            |    |     |     |     |     |     |
|------------------------------------------------------------|----|-----|-----|-----|-----|-----|
| Medication records                                         | 0% | 32% | 11% | 3%  | 24% | 30% |
| Record of any supplements used                             | 0% | 22% | 22% | 3%  | 25% | 28% |
| Body weight (using a weigh bridge)                         | 0% | 5%  | 30% | 5%  | 43% | 16% |
| Body Condition Score                                       | 0% | 3%  | 27% | 8%  | 51% | 11% |
| Pain scoring of unridden horse                             | 0% | 17% | 19% | 8%  | 25% | 31% |
| Pain scoring of ridden horse                               | 0% | 19% | 16% | 11% | 32% | 22% |
| Welfare assessment e.g., using an established welfare tool | 0% | 11% | 19% | 14% | 30% | 27% |

Other areas experts commented as important in free text: Daily check by groom; Monthly quantitative gait assessment; keeping a record / logbook of key elements of horse management such as feed and exercise.
